# Supplementary material for: Strong CD8+ lymphocyte infiltration in combination with expression of HLA class I is associated with better tumor control in breast cancer patients treated with neoadjuvant chemotherapy
Source: Springer Nature journal article supplement (doi:10.1007/s10549-019-05195-y), 2019-03-13
Supplement: MOESM1 [file 16541014]

## Online Resource 1

**Strong CD8+ lymphocyte infiltration in combination with expression of HLA class I is associated with better tumor control in breast cancer patients treated with neoadjuvant chemotherapy**

**Journal:** Breast Cancer Research and Treatment

**Authors:** A.F. de Groot<sup>1</sup>, E.J. Blok<sup>1,2</sup>, A. Charehbili<sup>1,2</sup>, C.C. Engels<sup>2</sup>, V.T.H.B.M. Smit<sup>3</sup>, N.G. Dekker-Ensink<sup>2</sup>, H. Putter<sup>4</sup>, E. Meershoek - Klein Kranenbarg<sup>2</sup>, C.J.H. van de Velde<sup>2</sup>, G.J. Liefers<sup>2</sup>, J.W.R. Nortier<sup>1</sup>, P.J.K. Kuppen<sup>2</sup>, S.H. van der Burg<sup>1</sup>, J.R. Kroep<sup>1</sup>

Departments of Medical Oncology<sup>1</sup>, Surgery<sup>2</sup>, Pathology<sup>3</sup>, Statistics<sup>4</sup>, Leiden University Medical Center, Leiden, The Netherlands

**Corresponding author:** Judith R. Kroep, M.D., Ph.D. ([j.r.kroep@lumc.nl](mailto:j.r.kroep@lumc.nl))

**Online Resource 1** Patient and tumor characteristics of successfully scored patients for each separate immune marker

| Parameter                 |                   | CD8+ CTLs by median (n=160) |       |                 |       | FoxP3+ Tregs by median (n=156) |              |                 |              | CD68+ TAMs by median (n=163) |              |                 |              | HLA class 1 status (n=178) |              |            |              |
|---------------------------|-------------------|-----------------------------|-------|-----------------|-------|--------------------------------|--------------|-----------------|--------------|------------------------------|--------------|-----------------|--------------|----------------------------|--------------|------------|--------------|
|                           |                   | Low (< median)              |       | High (> median) |       | Low (< median)                 |              | High (> median) |              | Low (< median)               |              | High (> median) |              | Loss or downregulation     |              | Expression |              |
|                           |                   | N                           | %     | N               | %     | N                              | %            | N               | %            | N                            | %            | N               | %            | N                          | %            | N          | %            |
| Age                       | <55 years         | 59                          | 50.0% | 59              | 50.0% | 59                             | 51.8%        | 55              | 48.2%        | 64                           | 52.9%        | 57              | 47.1%        | <b>38</b>                  | <b>29.0%</b> | <b>93</b>  | <b>71.0%</b> |
|                           | 55-64 years       | 17                          | 50.0% | 17              | 50.0% | 16                             | 47.1%        | 18              | 52.9%        | 15                           | 42.9%        | 20              | 57.1%        | <b>19</b>                  | <b>48.7%</b> | <b>20</b>  | <b>51.3%</b> |
|                           | >64 years         | 4                           | 50.0% | 4               | 50.0% | 3                              | 37.5%        | 5               | 62.5%        | 3                            | 42.9%        | 4               | 57.1%        | <b>4</b>                   | <b>50.0%</b> | <b>4</b>   | <b>50.0%</b> |
| HR status                 | HR- (TNBC)        | 11                          | 42.3% | 15              | 57.7% | <b>5</b>                       | <b>19.2%</b> | <b>21</b>       | <b>80.8%</b> | 12                           | 48.0%        | 13              | 52.0%        | <b>4</b>                   | <b>13.8%</b> | <b>25</b>  | <b>86.2%</b> |
|                           | HR+               | 69                          | 51.5% | 65              | 48.5% | <b>73</b>                      | <b>56.2%</b> | <b>57</b>       | <b>43.8%</b> | 70                           | 50.7%        | 68              | 49.3%        | <b>57</b>                  | <b>38.3%</b> | <b>92</b>  | <b>61.7%</b> |
| Clinical tumor stage      | cT1/ cT2          | 43                          | 44.8% | 53              | 55.2% | 37                             | 43.0%        | 49              | 57.0%        | 47                           | 48.5%        | 50              | 51.5%        | <b>26</b>                  | <b>25.2%</b> | <b>77</b>  | <b>74.8%</b> |
|                           | cT3/cT4           | 37                          | 57.8% | 27              | 42.2% | 41                             | 58.6%        | 29              | 41.4%        | 35                           | 53.0%        | 31              | 47.0%        | <b>35</b>                  | <b>46.7%</b> | <b>40</b>  | <b>53.3%</b> |
| Clinical lymph node stage | cN-               | 42                          | 56.8% | 32              | 43.2% | <b>43</b>                      | <b>60.6%</b> | <b>28</b>       | <b>39.4%</b> | 43                           | 58.1%        | 31              | 41.9%        | <b>36</b>                  | <b>42.9%</b> | <b>48</b>  | <b>57.1%</b> |
|                           | cN+               | 38                          | 44.2% | 48              | 55.8% | <b>35</b>                      | <b>41.2%</b> | <b>50</b>       | <b>58.8%</b> | 39                           | 43.8%        | 50              | 56.2%        | <b>25</b>                  | <b>26.6%</b> | <b>69</b>  | <b>73.4%</b> |
| Tumor type                | Ductal            | 52                          | 46.4% | 60              | 53.6% | <b>45</b>                      | <b>41.7%</b> | <b>63</b>       | <b>58.3%</b> | 61                           | 53.5%        | 53              | 46.5%        | 35                         | 28.2%        | 89         | 71.8%        |
|                           | Lobular           | 9                           | 40.9% | 13              | 59.1% | <b>19</b>                      | <b>73.1%</b> | <b>7</b>        | <b>26.9%</b> | 9                            | 36.0%        | 16              | 64.0%        | 12                         | 44.4%        | 15         | 55.6%        |
|                           | Other             | 10                          | 66.7% | 5               | 33.3% | <b>7</b>                       | <b>70.0%</b> | <b>3</b>        | <b>30.0%</b> | 7                            | 53.8%        | 6               | 46.2%        | 7                          | 50.0%        | 7          | 50.0%        |
| Menopausal status         | Pre               | 45                          | 49.5% | 46              | 50.5% | 41                             | 48.8%        | 43              | 51.2%        | <b>51</b>                    | <b>57.3%</b> | <b>38</b>       | <b>42.7%</b> | 31                         | 32.0%        | 66         | 68.0%        |
|                           | Peri              | 1                           | 20.0% | 4               | 80.0% | 2                              | 33.3%        | 4               | 66.7%        | <b>5</b>                     | <b>83.3%</b> | <b>1</b>        | <b>16.7%</b> | 2                          | 28.6%        | 5          | 71.4%        |
|                           | Post              | 33                          | 53.2% | 29              | 46.8% | 34                             | 53.1%        | 30              | 46.9%        | <b>26</b>                    | <b>39.4%</b> | <b>40</b>       | <b>60.6%</b> | 28                         | 38.9%        | 44         | 61.1%        |
| Allocated treatment       | Chemotherapy + ZA | 33                          | 42.3% | 45              | 57.7% | 40                             | 50.6%        | 39              | 49.4%        | 36                           | 46.2%        | 42              | 53.8%        | 30                         | 34.9%        | 56         | 65.1%        |
|                           | Chemotherapy only | 47                          | 57.3% | 35              | 42.7% | 38                             | 49.4%        | 39              | 50.6%        | 46                           | 54.1%        | 39              | 45.9%        | 31                         | 33.7%        | 61         | 66.3%        |

Loss or downregulation of HLA class 1 is defined as <5% of tumor cells staining positive for HCA2 and HC10 (loss), or either HCA2 or HC10 (downregulation).

Expression of HLA class 1 is defined as ≥5% of tumor cells staining positive for HCA2 and HC10. **Bold/underline**: Chi-square or Fisher's exact p-value <0.05. *CTLs*

cytotoxic T-cells, *HR* hormone receptor, *TAMs* tumor-associated macrophages, *TNBC* triple negative breast cancer, *Tregs* regulatory T-cells, *ZA* zoledronic acid
