# Supplementary material for: Strong CD8+ lymphocyte infiltration in combination with expression of HLA class I is associated with better tumor control in breast cancer patients treated with neoadjuvant chemotherapy
Source: Springer Nature journal article supplement (doi:10.1007/s10549-019-05195-y), 2019-03-13
Supplement: MOESM2 [file 16541014]

## Online Resource 2

**Strong CD8+ lymphocyte infiltration in combination with expression of HLA class I is associated with better tumor control in breast cancer patients treated with neoadjuvant chemotherapy**

**Journal:** Breast Cancer Research and Treatment

**Authors:** A.F. de Groot<sup>1</sup>, E.J. Blok<sup>1,2</sup>, A. Charehbili<sup>1,2</sup>, C.C. Engels<sup>2</sup>, V.T.H.B.M. Smit<sup>3</sup>, N.G. Dekker-Ensink<sup>2</sup>, H. Putter<sup>4</sup>, E. Meershoek - Klein Kranenbarg<sup>2</sup>, C.J.H. van de Velde<sup>2</sup>, G.J. Liefers<sup>2</sup>, J.W.R. Nortier<sup>1</sup>, P.J.K. Kuppen<sup>2</sup>, S.H. van der Burg<sup>1</sup>, J.R. Kroep<sup>1</sup>

Departments of Medical Oncology<sup>1</sup>, Surgery<sup>2</sup>, Pathology<sup>3</sup>, Statistics<sup>4</sup>, Leiden University Medical Center, Leiden, The Netherlands

**Corresponding author:** Judith R. Kroep, M.D., Ph.D. ([j.r.kroep@lumc.nl](mailto:j.r.kroep@lumc.nl))

**Online Resource 2** Overview of general statistics for each immune marker (whole group and stratified on allocated treatment)

|                            |                                          | <b>CD8+ CTLs (per mm<sup>2</sup>)</b>    | <b>FoxP3+ Tregs (per mm<sup>2</sup>)</b> | <b>CD68+ TAMs (per mm<sup>2</sup>)</b> |        |
|----------------------------|------------------------------------------|------------------------------------------|------------------------------------------|----------------------------------------|--------|
| <b>Whole group</b>         | Number (successful staining and scoring) | 160                                      | 156                                      | 163                                    |        |
|                            | Mean                                     | 536.8                                    | 87.5                                     | 592.3                                  |        |
|                            | Median                                   | 269.0                                    | 29.4                                     | 352.2                                  |        |
|                            | Standard deviation                       | 853.3                                    | 134.1                                    | 733.7                                  |        |
|                            | Minimum                                  | 0.00                                     | 0.00                                     | 2.00                                   |        |
|                            | Maximum                                  | 5883.4                                   | 681.3                                    | 3858.2                                 |        |
| <b>Allocated treatment</b> | <b>Chemotherapy + ZA</b>                 | Number (successful staining and scoring) | 78                                       | 79                                     | 78     |
|                            |                                          | Mean                                     | 466.3                                    | 84.8                                   | 548.6  |
|                            |                                          | Median                                   | 291.4                                    | 25.2                                   | 382.3  |
|                            |                                          | Standard deviation                       | 557.1                                    | 125.0                                  | 615.9  |
|                            |                                          | Minimum                                  | 0.70                                     | 0.00                                   | 10.6   |
|                            |                                          | Maximum                                  | 3464.6                                   | 632.8                                  | 3208.0 |
|                            | <b>Chemotherapy only</b>                 | Number (successful staining and scoring) | 82                                       | 77                                     | 85     |
|                            |                                          | Mean                                     | 603.9                                    | 90.2                                   | 632.5  |
|                            |                                          | Median                                   | 184.5                                    | 32.7                                   | 270.4  |
|                            |                                          | Standard deviation                       | 1060.6                                   | 143.6                                  | 828.8  |
|                            |                                          | Minimum                                  | 0.00                                     | 0.00                                   | 2.00   |
|                            |                                          | Maximum                                  | 5883.4                                   | 681.3                                  | 3858.2 |

Scores represent number of immune cells per mm<sup>2</sup> tumor area. *CTLs* cytotoxic T-cells, *TAMs* tumor-associated macrophages, *Tregs* regulatory T-cells, *ZA* zoledronic acid
