# Supplementary material for: Strong CD8+ lymphocyte infiltration in combination with expression of HLA class I is associated with better tumor control in breast cancer patients treated with neoadjuvant chemotherapy
Source: Springer Nature journal article supplement (doi:10.1007/s10549-019-05195-y), 2019-03-13
Supplement: MOESM3 [file 16541014]

### Online Resource 3

**Strong CD8+ lymphocyte infiltration in combination with expression of HLA class I is associated with better tumor control in breast cancer patients treated with neoadjuvant chemotherapy**

**Journal:** Breast Cancer Research and Treatment

**Authors:** A.F. de Groot<sup>1</sup>, E.J. Blok<sup>1,2</sup>, A. Charehbili<sup>1,2</sup>, C.C. Engels<sup>2</sup>, V.T.H.B.M. Smit<sup>3</sup>, N.G. Dekker-Ensink<sup>2</sup>, H. Putter<sup>4</sup>, E. Meershoek - Klein Kranenbarg<sup>2</sup>, C.J.H. van de Velde<sup>2</sup>, G.J. Liefers<sup>2</sup>, J.W.R. Nortier<sup>1</sup>, P.J.K. Kuppen<sup>2</sup>, S.H. van der Burg<sup>1</sup>, J.R. Kroep<sup>1</sup>

Departments of Medical Oncology<sup>1</sup>, Surgery<sup>2</sup>, Pathology<sup>3</sup>, Statistics<sup>4</sup>, Leiden University Medical Center, Leiden, The Netherlands

**Corresponding author:** Judith R. Kroep, M.D., Ph.D. ([j.r.kroep@lumc.nl](mailto:j.r.kroep@lumc.nl))

**Online Resource 3** Response (pCR) to chemotherapy **a** Stratified on immune markers and **b** Based on immune markers, stratified on HLA class 1 status

**a**

|                               |                        | No pCR |       | pCR |       | Total | P-value |
|-------------------------------|------------------------|--------|-------|-----|-------|-------|---------|
|                               |                        | N      | %     | N   | %     | N     |         |
| <b>CD8+ CTLs by median</b>    | Low (< median)         | 73     | 94.8% | 4   | 5.2%  | 153   | 0.01    |
|                               | High (> median)        | 62     | 81.6% | 14  | 18.4% |       |         |
| <b>FoxP3+ Tregs by median</b> | Low (< median)         | 71     | 91.0% | 7   | 9.0%  | 150   | 0.49    |
|                               | High (> median)        | 63     | 87.5% | 9   | 12.5% |       |         |
| <b>CD68+ TAMs by median</b>   | Low (< median)         | 70     | 88.6% | 9   | 11.4% | 157   | 0.98    |
|                               | High (> median)        | 69     | 88.5% | 9   | 11.5% |       |         |
| <b>HLA class 1 status</b>     | Loss or downregulation | 56     | 96.6% | 2   | 3.4%  | 171   | 0.03    |
|                               | Expression             | 97     | 85.8% | 16  | 14.2% |       |         |

**b**

|                               |                 | HLA class 1 status     |        |     |      |       |         |            |       |     |       |       |         |
|-------------------------------|-----------------|------------------------|--------|-----|------|-------|---------|------------|-------|-----|-------|-------|---------|
|                               |                 | Loss or downregulation |        |     |      |       |         | Expression |       |     |       |       |         |
|                               |                 | No pCR                 |        | pCR |      | Total | P-value | No pCR     |       | pCR |       | Total | P-value |
|                               |                 | N                      | %      | N   | %    | N     |         | N          | %     | N   | %     | N     |         |
| <b>CD8+ CTLs by median</b>    | Low (< median)  | 28                     | 100.0% | 0   | 0.0% | 45    | 0.38    | 42         | 93.3% | 3   | 6.7%  | 100   | 0.04    |
|                               | High (> median) | 16                     | 94.1%  | 1   | 5.9% |       |         | 43         | 78.2% | 12  | 21.8% |       |         |
| <b>FoxP3+ Tregs by median</b> | Low (< median)  | 34                     | 94.4%  | 2   | 5.6% | 49    | 1.00    | 33         | 89.2% | 4   | 10.8% | 96    | 0.54    |
|                               | High (> median) | 13                     | 100.0% | 0   | 0.0% |       |         | 50         | 84.7% | 9   | 15.3% |       |         |
| <b>CD68+ TAMs by median</b>   | Low (< median)  | 22                     | 100.0% | 0   | 0.0% | 42    | 0.48    | 47         | 85.5% | 8   | 14.5% | 106   | 0.90    |
|                               | High (> median) | 19                     | 95.0%  | 1   | 5.0% |       |         | 44         | 86.3% | 7   | 13.7% |       |         |

Loss or downregulation of HLA class 1 is defined as <5% of tumor cells staining positive for HCA2 and HC10 (loss), or either HCA2 or HC10 (downregulation).

Expression of HLA class 1 is defined as ≥5% of tumor cells staining positive for HCA2 and HC10. P-values represent Chi-square or Fisher's exact tests. *CTLs* cytotoxic

T-cells, *pCR* pathological complete response, *TAMs* tumor-associated macrophages, *Tregs* regulatory T-cells
