# Supplementary material for: Strong CD8+ lymphocyte infiltration in combination with expression of HLA class I is associated with better tumor control in breast cancer patients treated with neoadjuvant chemotherapy
Source: Springer Nature journal article supplement (doi:10.1007/s10549-019-05195-y), 2019-03-13
Supplement: MOESM4 [file 16541014]

#### **Online Resource 4**

**Strong CD8+ lymphocyte infiltration in combination with expression of HLA class I is associated with better tumor control in breast cancer patients treated with neoadjuvant chemotherapy**

**Journal:** Breast Cancer Research and Treatment

**Authors:** A.F. de Groot<sup>1</sup>, E.J. Blok<sup>1,2</sup>, A. Charehbili<sup>1,2</sup>, C.C. Engels<sup>2</sup>, V.T.H.B.M. Smit<sup>3</sup>, N.G. Dekker-Ensink<sup>2</sup>, H. Putter<sup>4</sup>, E. Meershoek - Klein Kranenbarg<sup>2</sup>, C.J.H. van de Velde<sup>2</sup>, G.J. Liefers<sup>2</sup>, J.W.R. Nortier<sup>1</sup>, P.J.K. Kuppen<sup>2</sup>, S.H. van der Burg<sup>1</sup>, J.R. Kroep<sup>1</sup>

Departments of Medical Oncology<sup>1</sup>, Surgery<sup>2</sup>, Pathology<sup>3</sup>, Statistics<sup>4</sup>, Leiden University Medical Center, Leiden, The Netherlands

**Corresponding author:** Judith R. Kroep, M.D., Ph.D. ([j.r.kroep@lumc.nl](mailto:j.r.kroep@lumc.nl))

**Online Resource 4** Immune marker-based analyses stratified on HR status and menopausal status

|                   |            | CD8+ CTLs      |       |                 |       | P-value | FoxP3+ Tregs   |       |                 |       | P-value | CD68+ TAMs     |       |                 |        | P-value | HLA class 1 status    |       |            |       | P-value |
|-------------------|------------|----------------|-------|-----------------|-------|---------|----------------|-------|-----------------|-------|---------|----------------|-------|-----------------|--------|---------|-----------------------|-------|------------|-------|---------|
|                   |            | Low (< median) |       | High (> median) |       |         | Low (< median) |       | High (> median) |       |         | Low (< median) |       | High (> median) |        |         | Loss + downregulation |       | Expression |       |         |
|                   |            | pCR            |       | pCR             |       |         | pCR            |       | pCR             |       |         | pCR            |       | pCR             |        |         | pCR                   |       | pCR        |       |         |
|                   |            | N              | %     | N               | %     |         | N              | %     | N               | %     |         | N              | %     | N               | %      |         | N                     | %     | N          | %     |         |
| HR status         | HR- (TNBC) | 1              | 10.0% | 6               | 42.9% | 0.17    | 1              | 20.0% | 6               | 31.6% | 1.00    | 4              | 36.4% | 4               | 33.3%  | 1.00    | 0                     | 0.0%  | 7          | 30.4% | 0.55    |
|                   | HR+        | 3              | 4.5%  | 8               | 12.9% | 0.09    | 6              | 8.2%  | 3               | 5.7%  | 0.73    | 5              | 7.4%  | 5               | 7.6%   | 1.00    | 2                     | 3.7%  | 9          | 10.0% | 0.21    |
| Menopausal status | Pre        | 2              | 4.8%  | 7               | 15.9% | 0.16    | 3              | 7.3%  | 3               | 7.7%  | 1.00    | 6              | 12.2% | 2               | 5.6%   | 0.46    | 1                     | 3.4%  | 7          | 11.1% | 0.43    |
|                   | Peri       | 0              | 0.0%  | 2               | 50.0% | 1.00    | 1              | 50.0% | 2               | 50.0% | 1.00    | 1              | 20.0% | 1               | 100.0% | 0.33    | 1                     | 50.0% | 2          | 40.0% | 1.00    |
|                   | Post       | 1              | 3.0%  | 5               | 18.5% | 0.08    | 2              | 5.9%  | 4               | 14.3% | 0.40    | 2              | 8.0%  | 5               | 12.8%  | 0.70    | 0                     | 0.0%  | 6          | 14.0% | 0.08    |

Loss or downregulation of HLA class 1 is defined as <5% of tumor cells staining positive for HCA2 and HC10 (loss), or either HCA2 or HC10 (downregulation).

Expression of HLA class 1 is defined as ≥5% of tumor cells staining positive for HCA2 and HC10. P-values represent Chi-square or Fisher's exact tests. *CTLs* cytotoxic T-cells, *HR* hormone receptor, *pCR* pathological complete response, *TAMs* tumor-associated macrophages, *TNBC* triple negative breast cancer, *Tregs* regulatory T-cells
