# Supplementary material for: Strong CD8+ lymphocyte infiltration in combination with expression of HLA class I is associated with better tumor control in breast cancer patients treated with neoadjuvant chemotherapy
Source: Springer Nature journal article supplement (doi:10.1007/s10549-019-05195-y), 2019-03-13
Supplement: MOESM5 [file 16541014]

## Online Resource 5

### **Strong CD8+ lymphocyte infiltration in combination with expression of HLA class I is associated with better tumor control in breast cancer patients treated with neoadjuvant chemotherapy**

**Journal:** Breast Cancer Research and Treatment

**Authors:** A.F. de Groot<sup>1</sup>, E.J. Blok<sup>1,2</sup>, A. Charehbili<sup>1,2</sup>, C.C. Engels<sup>2</sup>, V.T.H.B.M. Smit<sup>3</sup>, N.G. Dekker-Ensink<sup>2</sup>, H. Putter<sup>4</sup>, E. Meershoek - Klein Kranenbarg<sup>2</sup>, C.J.H. van de Velde<sup>2</sup>, G.J. Liefers<sup>2</sup>, J.W.R. Nortier<sup>1</sup>, P.J.K. Kuppen<sup>2</sup>, S.H. van der Burg<sup>1</sup>, J.R. Kroep<sup>1</sup>

Departments of Medical Oncology<sup>1</sup>, Surgery<sup>2</sup>, Pathology<sup>3</sup>, Statistics<sup>4</sup>, Leiden University Medical Center, Leiden, The Netherlands

**Corresponding author:** Judith R. Kroep, M.D., Ph.D. ([j.r.kroep@lumc.nl](mailto:j.r.kroep@lumc.nl))

**Online Resource 5** Kaplan-Meier survival estimates based on HR status and based on CD8+ tumor infiltrate, stratified on HLA class 1 status

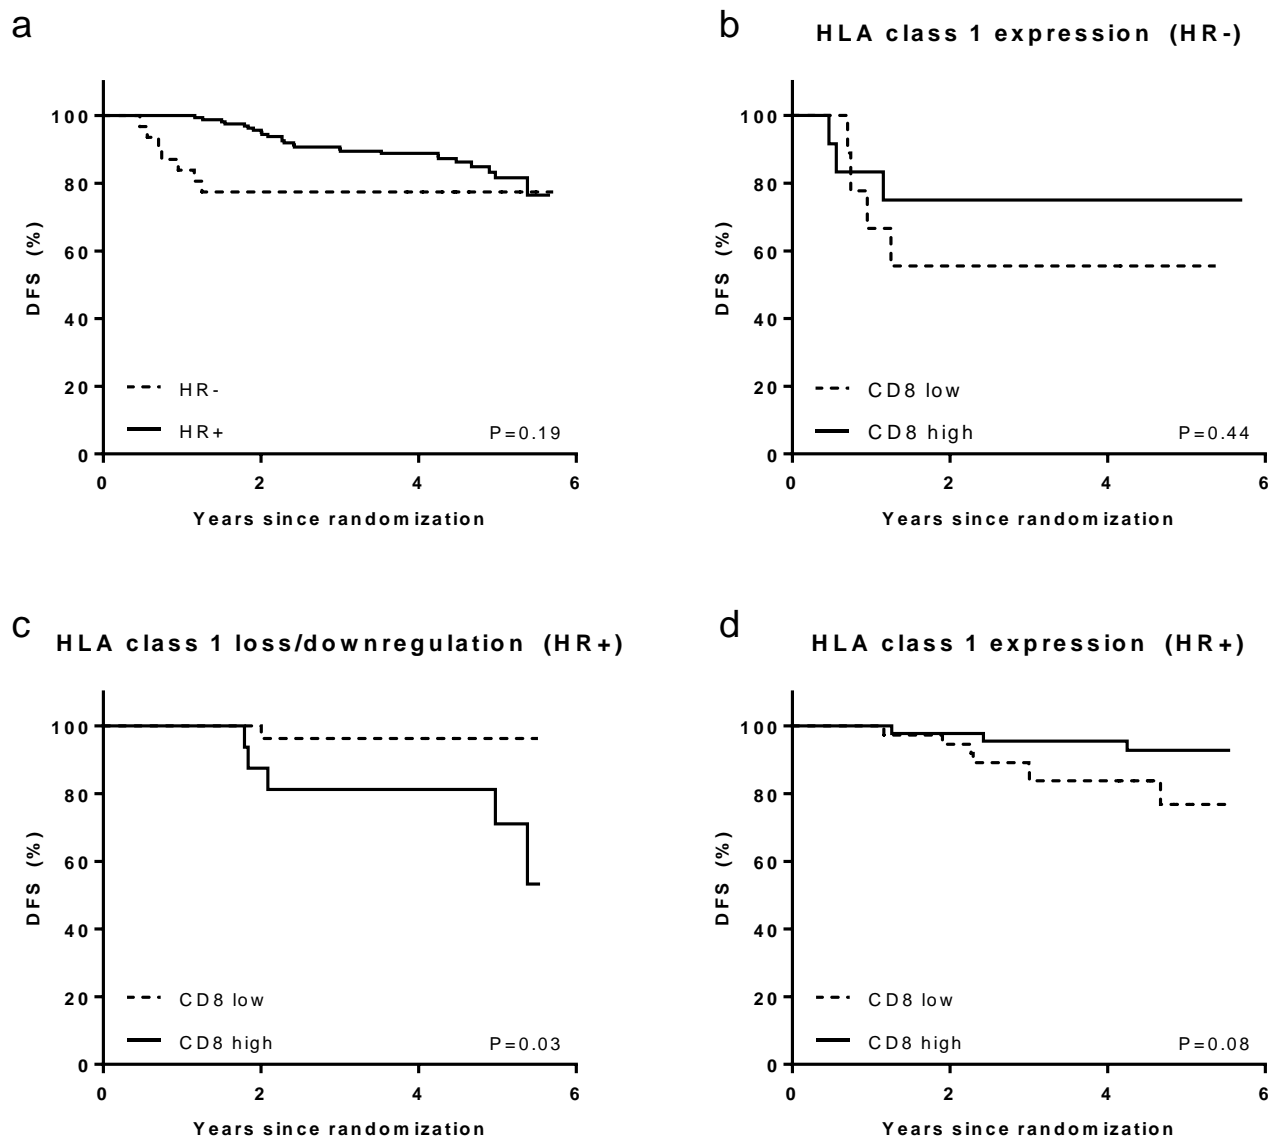

**a** Effect of HR status on DFS (hazard ratio 0.57, 95% CI 0.25-1.32,  $p=0.19$ ) **b** Effect of CD8+ tumor infiltrate on DFS in patients with HR- disease with HLA class 1 expression (hazard ratio 0.56, 95% CI 0.12-2.49,  $p=0.44$ ; Kaplan-Meier survival estimate and Cox regression analysis not possible for HLA class 1 loss or downregulation due to small numbers;  $p$  for interaction 0.99) **c** Effect of CD8+ tumor infiltrate on DFS in patients with HR+ disease with HLA class 1 loss or downregulation (hazard ratio 7.51, 95% CI 0.87-65.20,  $p=0.07$ ) **d** Effect of CD8+ tumor infiltrate on DFS in patients with HR+ disease with HLA class 1 expression (hazard ratio 0.32, 95% CI 0.08-1.24,  $p=0.098$ ).  $P$  for interaction 0.01.  $P$ -values in figure represent log-rank survival test
